# Supplementary material
Source: MDPI journal article supplement (https://www.mdpi.com/2073-4395/12/10/2299)
Supplement: s1 [file s1]

**Table S1.** Temperature and light during grain-filling periods of different varieties (2017)

| T    | C                    | Heading date | Maturity date | EAT   | ESR   | MT   |
|------|----------------------|--------------|---------------|-------|-------|------|
| IJHs | Yongyou1540          | 9/7          | 11/2          | 502.0 | 294.9 | 19.0 |
|      | Yongyou15            | 9/10         | 11/9          | 492.9 | 328.4 | 18.1 |
| IHs  | Liangyoupeijiu       | 9/6          | 10/24         | 388.8 | 228.6 | 20.1 |
|      | Shengliangyou5814    | 9/4          | 10/24         | 412.1 | 236.5 | 20.2 |
|      | Liangyou688          | 9/4          | 10/24         | 412.1 | 236.5 | 20.2 |
|      | Yixiangyou2115       | 8/31         | 10/24         | 459.3 | 252.4 | 20.5 |
|      | Qianyou911           | 9/4          | 10/24         | 412.1 | 236.5 | 20.2 |
|      | Yliangyou900         | 9/6          | 10/24         | 388.8 | 228.6 | 20.1 |
|      | Super1000            | 9/1          | 10/24         | 448.5 | 248.6 | 20.5 |
|      | Yangliangyou6        | 9/3          | 10/23         | 423.9 | 234.5 | 20.5 |
|      | Zhongzheyoun8        | 9/4          | 10/22         | 409.5 | 218.3 | 20.5 |
|      | Zhunliangyou608      | 9/4          | 10/22         | 409.5 | 218.3 | 20.5 |
|      | Qianyou930           | 9/4          | 10/22         | 409.5 | 218.3 | 20.5 |
|      | Zhongzheyoun1        | 8/31         | 10/21         | 455.2 | 228.1 | 20.9 |
|      | Fengyouxiangzhan     | 9/2          | 10/21         | 433.6 | 221.5 | 20.8 |
|      | Guangliangyouxiang66 | 9/5          | 10/21         | 396.4 | 210.3 | 20.6 |
|      | Yliangyou1           | 9/2          | 10/21         | 433.6 | 221.5 | 20.8 |
|      | Tianyouhuazhan       | 9/5          | 10/21         | 396.4 | 210.3 | 20.6 |
|      | Zhongzheyoun10       | 8/31         | 10/21         | 455.2 | 228.1 | 20.9 |
|      | Cliangyouhuazhan     | 8/24         | 10/21         | 550.5 | 278.2 | 21.5 |
|      | Huiliangyou898       | 8/24         | 10/21         | 550.5 | 278.2 | 21.5 |
|      | Quanyou3301          | 9/5          | 10/21         | 396.4 | 210.3 | 20.6 |
|      | Jvliangyou60         | 8/31         | 10/21         | 452.0 | 228.1 | 21.0 |
|      | Xingliangyou6        | 8/21         | 10/11         | 563.1 | 263.8 | 23.0 |
| JIs  | Nanjing46            | 9/15         | 11/9          | 393.7 | 256.1 | 17.5 |
|      | Suxiangjing100       | 9/15         | 11/9          | 397.7 | 263.9 | 17.5 |
|      | Wuyunjing30          | 9/9          | 11/4          | 471.5 | 297.1 | 18.4 |
|      | Nanjing5055          | 9/8          | 11/4          | 487.8 | 300.7 | 18.6 |
|      | Ningjing7            | 9/1          | 11/4          | 587.1 | 331.1 | 19.2 |
|      | Ningjing3            | 9/7          | 11/3          | 502.0 | 294.9 | 18.8 |
|      | Wujing14             | 9/6          | 11/2          | 610.6 | 294.2 | 20.7 |
|      | Wuyunjing23          | 9/9          | 11/2          | 470.7 | 280.1 | 18.7 |
|      | Ningjing4            | 8/26         | 11/2          | 674.4 | 347.4 | 19.9 |
|      | Wuyunjing31          | 9/9          | 11/2          | 470.7 | 280.1 | 18.7 |
|      | Ningjing8            | 9/8          | 11/2          | 487.1 | 283.8 | 18.9 |
|      | Huaidao5             | 9/7          | 10/30         | 489.8 | 266.2 | 19.2 |
|      | Ningjing1            | 9/9          | 10/30         | 458.7 | 259.9 | 19.0 |
|      | Ningjing2            | 9/5          | 10/30         | 518.4 | 279.9 | 19.4 |

|     |              |      |       |       |       |      |
|-----|--------------|------|-------|-------|-------|------|
|     | Nanjing9108  | 9/2  | 10/30 | 561.6 | 291.1 | 19.7 |
|     | Nanjing0212  | 9/2  | 10/30 | 561.6 | 291.1 | 19.7 |
|     | Wuyujing3    | 8/31 | 10/29 | 586.4 | 289.3 | 19.9 |
|     | Wuyunjing24  | 9/1  | 10/29 | 573.5 | 285.5 | 19.9 |
|     | Ningjing5    | 8/31 | 10/29 | 586.4 | 289.3 | 19.9 |
|     | Nanjing52    | 9/1  | 10/29 | 573.5 | 285.5 | 19.9 |
|     | Suxiangjing3 | 8/17 | 10/3  | 685.5 | 292.3 | 24.3 |
|     | Ningjing6    | 8/17 | 10/3  | 685.5 | 292.3 | 24.3 |
| IIs | Yangdao6     | 9/2  | 10/14 | 416.3 | 186.6 | 21.7 |
|     | Huanghuazhan | 8/24 | 9/23  | 371.6 | 170.6 | 24.0 |

T, type; C, cultivars; EAT, effective accumulated temperature; ESR, effective solar radiation; MT, daily mean temperature.

**Table S2.** Temperature and light during grain-filling periods of different varieties (2018)

| T    | C                    | Heading date | Maturity date | EAT   | ESR   | MT   |
|------|----------------------|--------------|---------------|-------|-------|------|
| IJHs | Yongyou1540          | 9/9          | 10/21         | 442.4 | 343.6 | 22.5 |
|      | Yongyou15            | 9/13         | 10/23         | 396.7 | 331.8 | 21.9 |
| IHs  | Yixiangyou2115       | 9/4          | 10/14         | 412.4 | 367   | 22   |
|      | Liangyoupeijiu       | 9/2          | 10/12         | 402.4 | 357.5 | 21.9 |
|      | Zhongzheyu1          | 9/2          | 10/12         | 402.4 | 357.5 | 21.9 |
|      | Shengliangyou5814    | 9/2          | 10/12         | 402.4 | 357.5 | 21.9 |
|      | Zhongzheyu10         | 9/2          | 10/12         | 402.4 | 357.5 | 21.9 |
|      | Yliangyou900         | 9/3          | 10/12         | 387.6 | 343.6 | 21.8 |
|      | Quanyou3301          | 9/1          | 10/12         | 419.1 | 367.4 | 22.1 |
|      | Super1000            | 8/30         | 10/12         | 450.1 | 382   | 22.3 |
|      | Zhongzheyu8          | 8/29         | 10/11         | 462.7 | 383.4 | 24   |
|      | Zhunliangyou608      | 8/29         | 10/11         | 462.7 | 383.4 | 24   |
|      | Qianyou911           | 8/29         | 10/11         | 462.7 | 383.4 | 24   |
|      | Guangliangyouxiang66 | 9/2          | 10/10         | 395.4 | 339.6 | 22.3 |
|      | Liangyou688          | 9/3          | 10/10         | 380.5 | 325.7 | 22.3 |
|      | Yangliangyou6        | 9/2          | 10/10         | 395.4 | 339.6 | 22.3 |
|      | Qianyou930           | 9/2          | 10/10         | 395.4 | 339.6 | 22.3 |
|      | Fengyouxiangzhan     | 9/2          | 10/10         | 395.4 | 339.6 | 22.3 |
|      | Yliangyou1           | 9/2          | 10/9          | 393.6 | 329.5 | 22.5 |
|      | Cliangyouhuazhan     | 8/26         | 10/8          | 508.9 | 398.7 | 23.6 |
|      | Huiliangyou898       | 8/25         | 10/8          | 525.8 | 409.9 | 24.1 |
|      | Jvliangyou60         | 8/28         | 10/5          | 450.2 | 349.8 | 23.8 |
|      | Xingliangyou6        | 8/21         | 9/25          | 479.2 | 326.4 | 25.7 |
|      | Tianyouhuazhan       | 8/24         | 9/25          | 437.6 | 290.4 | 25.7 |
| JIs  | Nanjing46            | 9/9          | 11/4          | 517.3 | 439.3 | 19.2 |
|      | Suxiangjing100       | 9/9          | 11/4          | 517.3 | 439.3 | 19.2 |
|      | Wuyunjing30          | 8/31         | 10/29         | 622   | 494.8 | 20.5 |
|      | Nanjing5055          | 9/2          | 10/29         | 584.7 | 473.1 | 20.3 |
|      | Ningjing8            | 8/31         | 10/29         | 622   | 494.8 | 20.5 |
|      | Wuyunjing23          | 9/2          | 10/27         | 574.5 | 457.4 | 20.4 |
|      | Wuyunjing24          | 8/27         | 10/27         | 687.6 | 521.4 | 21.3 |
|      | Nanjing9108          | 8/27         | 10/27         | 687.6 | 521.4 | 21.3 |
|      | Nanjing0212          | 8/27         | 10/27         | 687.6 | 521.4 | 21.3 |
|      | Ningjing7            | 8/30         | 10/27         | 628.2 | 481.9 | 20.8 |
|      | Wujing14             | 9/2          | 10/24         | 561.4 | 431   | 20.8 |
|      | Huaidao5             | 8/29         | 10/25         | 641.4 | 473.1 | 21.3 |
|      | Ningjing2            | 9/1          | 10/24         | 580.2 | 440.8 | 20.9 |
|      | Ningjing4            | 8/25         | 10/24         | 713.2 | 521.5 | 21.9 |
|      | Wuyunjing31          | 9/2          | 10/24         | 561.4 | 431   | 20.8 |

|     |              |      |       |       |       |      |
|-----|--------------|------|-------|-------|-------|------|
|     | Wuyujing3    | 8/30 | 10/23 | 607.9 | 452.2 | 21.3 |
|     | Ningjing1    | 9/2  | 10/23 | 554.2 | 427.7 | 20.9 |
|     | Ningjing3    | 9/2  | 10/23 | 554.2 | 427.7 | 20.9 |
|     | Nanjing52    | 8/28 | 10/23 | 647.4 | 476.3 | 21.6 |
|     | Ningjing5    | 8/25 | 10/18 | 672.9 | 491.2 | 22.6 |
|     | Ningjing6    | 8/15 | 10/1  | 719.4 | 453.9 | 24.9 |
|     | Suxiangjing3 | 8/18 | 9/25  | 601.3 | 350.3 | 25.8 |
| IIs | Yangdao6     | 8/31 | 10/12 | 435.7 | 379.2 | 22.2 |
|     | Huanghuazhan | 8/24 | 9/22  | 408.3 | 259.6 | 26.6 |

T, type; C, cultivars; EAT, effective accumulated temperature; ESR, effective solar radiation; MT, daily mean temperature.
